# Supplementary material for: Enhanced response of titanium doped iron(ii) oxalate under electric field
Source: Royal Society of Chemistry journal article supplement (doi:10.1039/d2ra05608a), 2022-01-01
Supplement: d2ra05608a1.pdf [file d2ra05608a1.pdf]

## Enhanced response of titanium doped iron(II) oxalate under electric field

Chunde Li,<sup>a</sup> Hua Wei,<sup>\*a,b</sup> Xueyan Hu,<sup>a</sup> Zhaoxian Chen,<sup>a</sup> Xin Xie,<sup>a</sup> Guo Chen,<sup>a</sup> Anping Liu,<sup>a</sup> Yingzhou Huang,<sup>a</sup> and Weijia Wen<sup>c</sup>

<sup>a</sup> Chongqing Key Laboratory of Soft Condensed Matter Physics and Smart Materials, College of Physics, Chongqing University, Chongqing 401331, China. Email: huawei.hw@cqu.edu.cn

<sup>b</sup> State Key Laboratory of Mechanical Transmissions, Chongqing University, Chongqing 400044, China.

<sup>c</sup> Department of Physics, The Hong Kong University of Science and Technology, Clear Water Bay, Kowloon, Hong Kong, China.

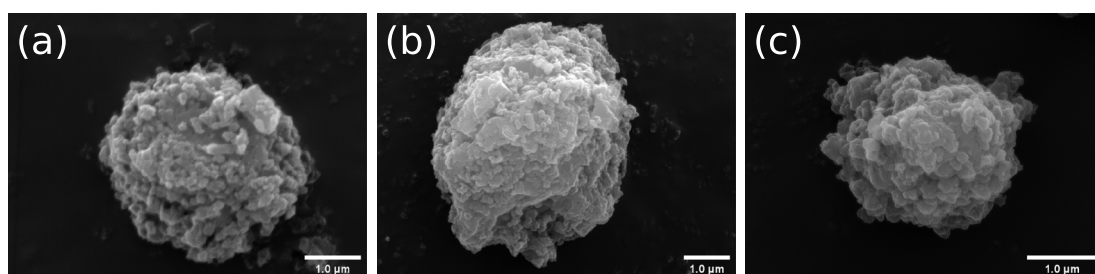

**Fig S1:** The SEM morphology of the particle dried at temperatures, (a) 50 °C, (b) 60 °C, and (c) 80 °C, respectively.

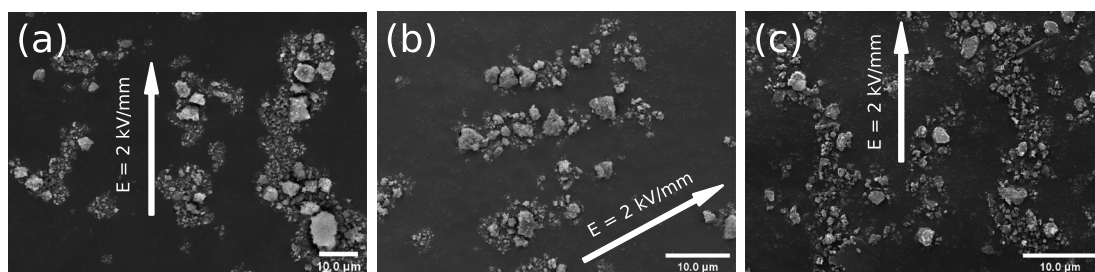

**Fig S2:** The SEM observation of the chain-like structure in the ER fluids with 2 wt %, mixing the particles dried at temperatures, (a) 50 °C, (b) 60 °C, and (c) 70 °C, respectively, in the N-butyl alcohol, under 2 kV/mm.

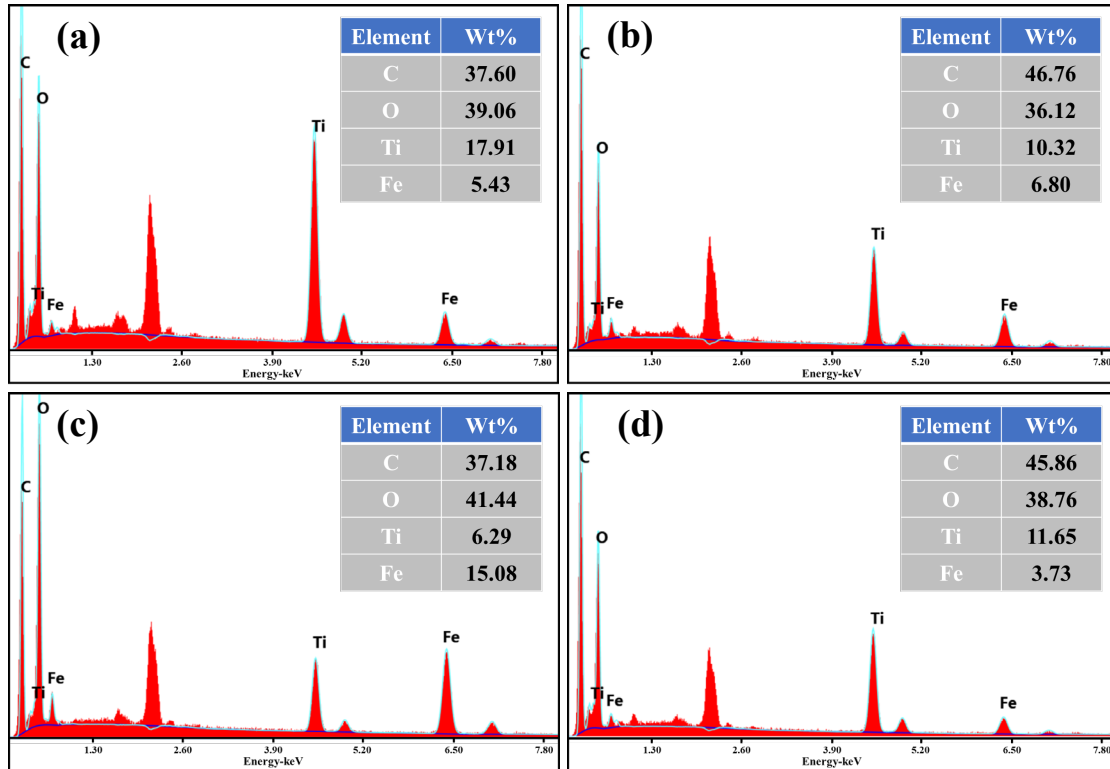

**Fig S3:** The EDS spectra of the particles dried at temperatures, **(a)** 50 °C, **(b)** 60 °C, **(c)** 70 °C, and **(d)** 80 °C, respectively.

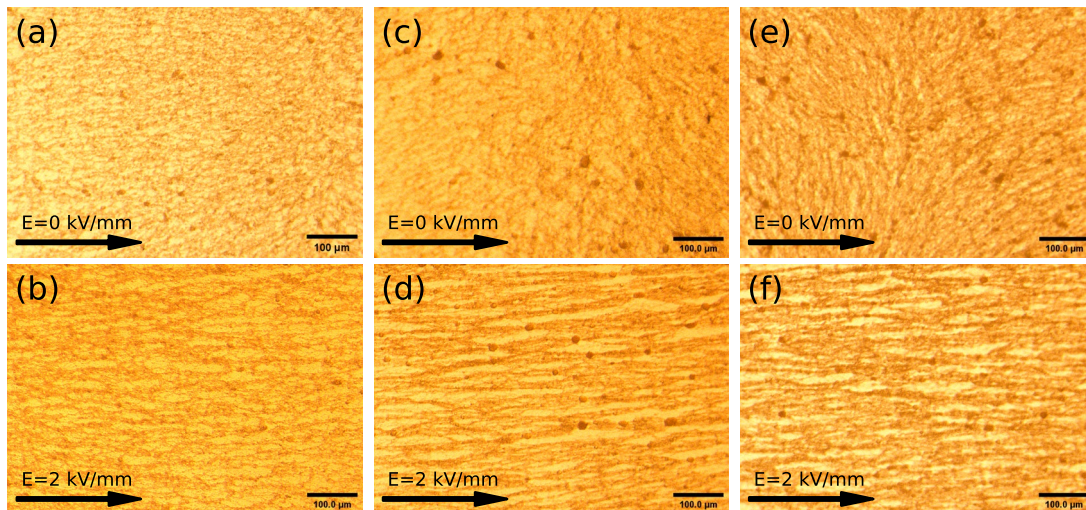

**Fig S4:** The optical image of the ER fluids with 5 wt %, consisting the particles dried at temperatures, **(a)(b)** 60 °C, **(c)(d)** 70 °C, and **(e)(f)** 80 °C, respectively, in silicone oil, under defecting the external electric field **(a) (c) (e)** and existing the field **(b) (d) (f)** with 2 kV/mm.

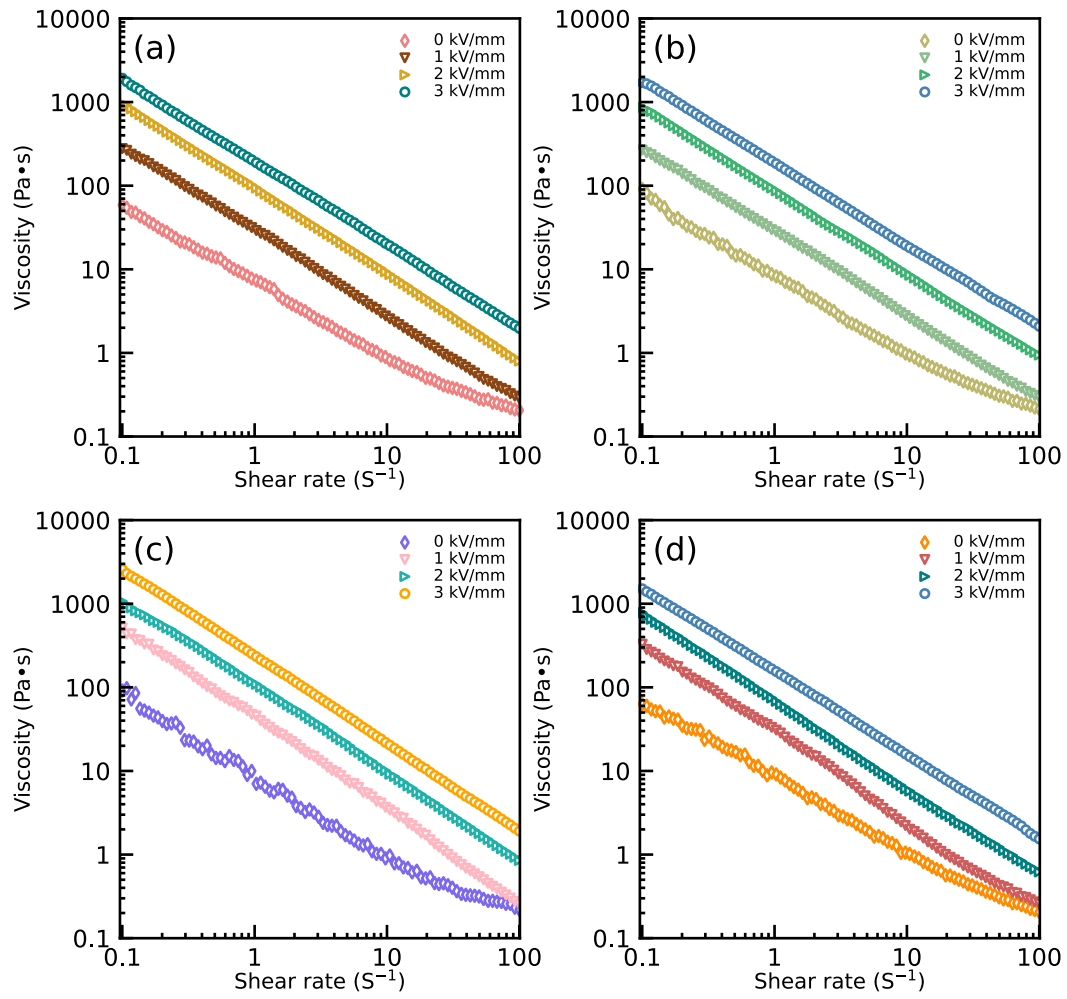

**Fig S5:** Dependences of the viscosity on the shear rate for the ER fluids with 20 wt %, mixing the different particles dried at temperatures, **(a)** 50 °C, **(b)** 60 °C, **(c)** 70°C, and **(d)** 80 °C, respectively, in silicone oil, under the various electric fields (0 – 3 kV/mm).
